# Supplementary material
Source: PubMed Central journal article supplement (PMC5933302)
Supplement: EHP1756.s001.acco.pdf [file EHP1756.s001.acco.pdf]

**Note to readers with disabilities:** *EHP* strives to ensure that all journal content is accessible to all readers. However, some figures and Supplemental Material published in *EHP* articles may not conform to [508 standards](#) due to the complexity of the information being presented. If you need assistance accessing journal content, please contact [ehp508@niehs.nih.gov](mailto:ehp508@niehs.nih.gov). Our staff will work with you to assess and meet your accessibility needs within 3 working days.

### **Supplemental Material**

## **Longer-Term Impact of High and Low Temperature on Mortality: An International Study to Clarify Length of Mortality Displacement**

Ben Armstrong, Michelle L. Bell, Micheline de Sousa Zanotti Stagliorio Coelho, Yue-Liang Leon Guo, Yuming Guo, Patrick Goodman, Masahiro Hashizume, Yasushi Honda, Ho Kim, Eric Lavigne, Paola Michelozzi, Paulo Hilario Nascimento Saldiva, Joel Schwartz, Matteo Scortichini, Francesco Sera, Aurelio Tobias, Shilu Tong, Chang-fu Wu, Antonella Zanobetti, Ariana Zeka, and Antonio Gasparrini

### **Table of Contents**

**Figure S1.** Estimates of model (2) regression coefficients  $\beta$  corrected for measurement error in  $AF_{\text{daily,t}}$  by SIMEX.

**Figure S2.** Sensitivity of overall association to month at which years were considered to start (year start month).

**Table S1.** Summary descriptive statistics by location.

**Additional File:** Separate zip file Demonstration R code for core analyses applied to UK and UK annual data.

1 Figure S1 Estimates of model (2) regression coefficients  $\beta$  corrected for measurement error in  $AF_{\text{daily},t}$  by SIMEX.

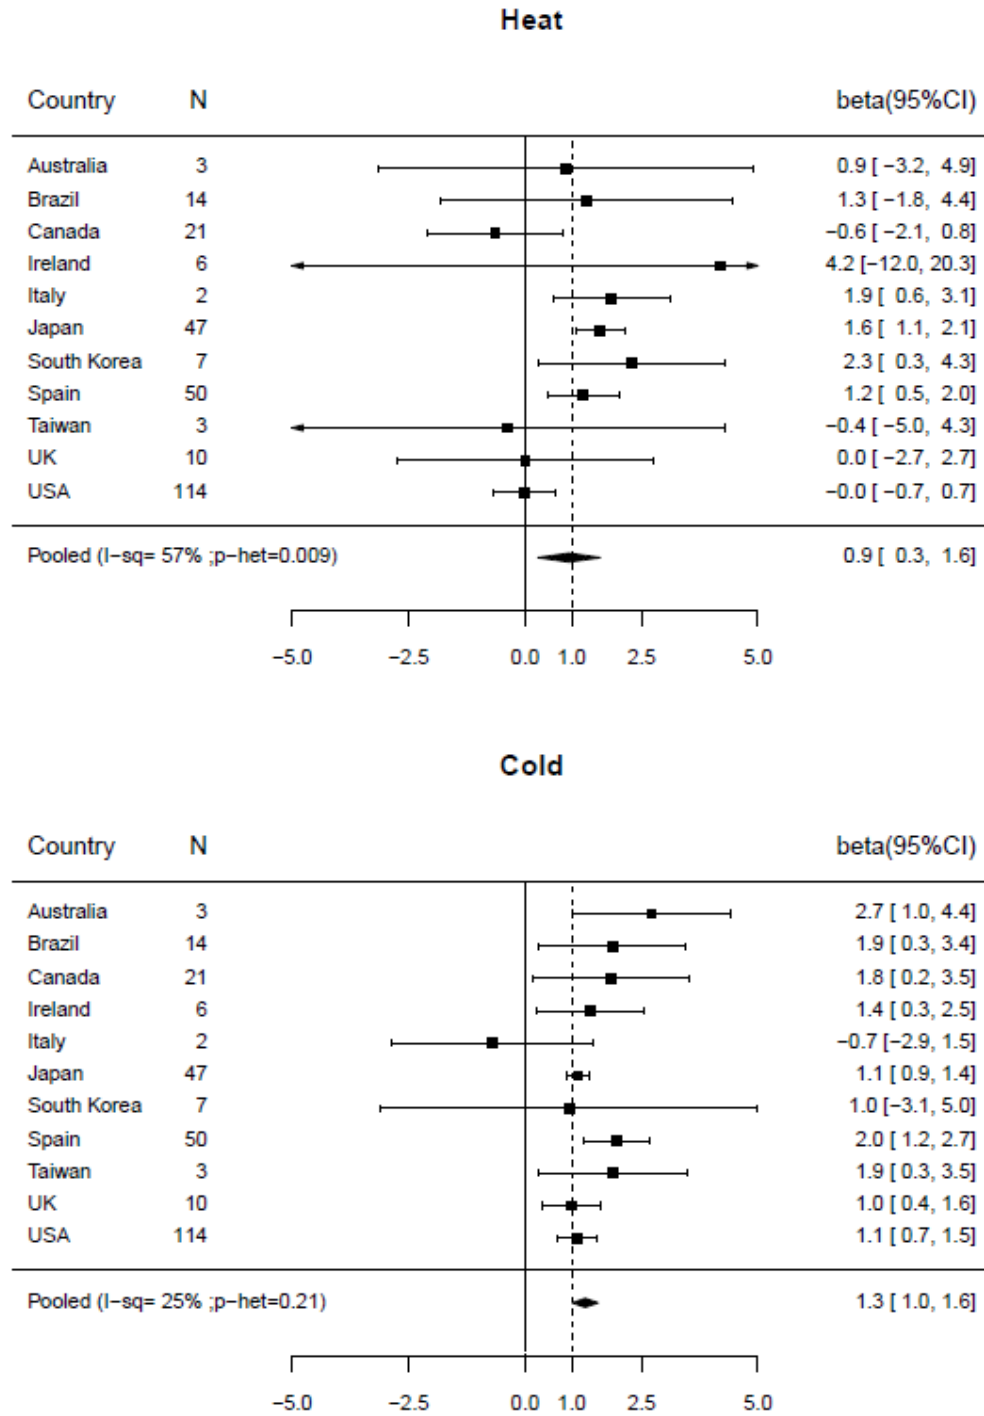

Specific SIMEX method. 100 simulations were undertaken for values of  $\lambda$  (additional error variance multiplier) = 0.5, 1, 1.5, and 2. Extrapolation of the curve for  $y = \text{mean of estimated } \beta$

(beta) values ( $\beta_\lambda$ ) by  $x=\lambda$  to predict a value  $\beta_{\text{SIMEX}}$  for  $\lambda=-1$  was by quadratic polynomial. To obtain  $SE(\beta_{\text{SIMEX}})$  we similarly extrapolated variance differences. For rationale and demonstration of asymptotic properties see Carroll et al 2006.

2 Figure S2 Sensitivity of overall association to month at which years were considered to start (year start month).

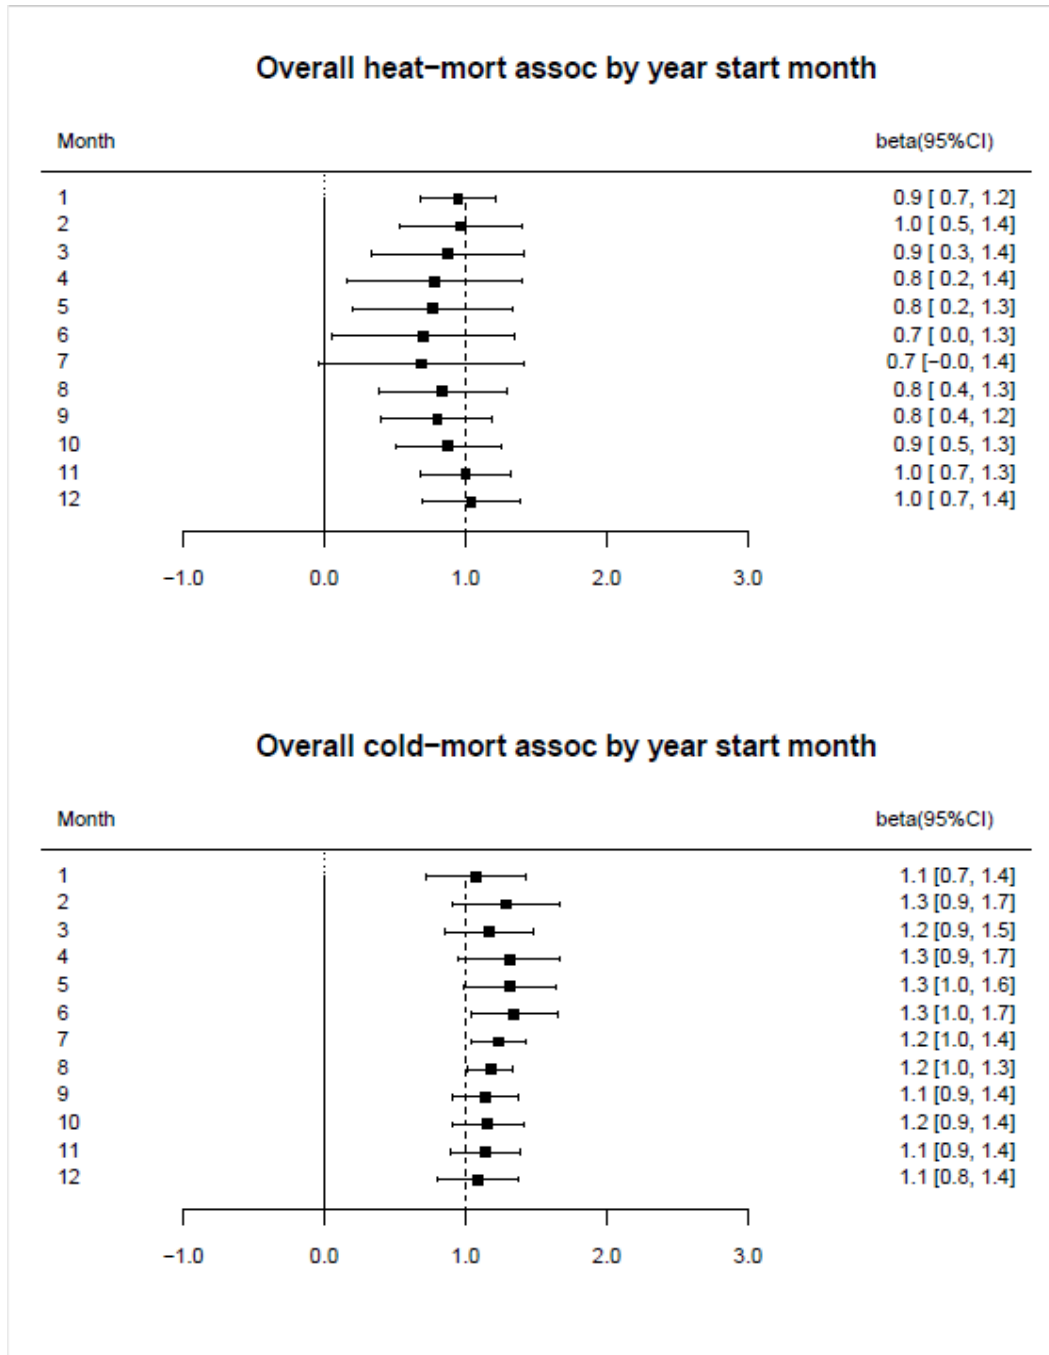

Note: Months are numbers from the first month after that including the winter solstice (January or July for Northern and Southern hemisphere respectively). For the main model years started in month 5 (heat) and 11 (cold)

3 Table S1. Summary descriptive statistics by location

| Country   | Location               | Period    | MMT(%ile) | Mean(SD) AF% |          | Mean(SD) °C |           |
|-----------|------------------------|-----------|-----------|--------------|----------|-------------|-----------|
|           |                        |           |           | heat         | cold     | heat        | cold      |
| Australia | Brisbane               | 1988-2008 | 23.1(71%) | 0.4(0.1)     | 4.9(0.2) | 0.5(0.1)    | 3.3(0.5)  |
| Australia | Melbourne              | 1991-2008 | 22.9(91%) | 0.6(0.2)     | 5.8(0.6) | 0.3(0.1)    | 7.3(0.4)  |
| Australia | Sydney                 | 1990-2008 | 22.6(83%) | 0.5(0.4)     | 7.5(0.9) | 0.3(0.2)    | 4.5(0.6)  |
| Brazil    | Belem                  | 1997-2010 | 26.7(41%) | 1.1(0.4)     | 1.1(0.6) | 0.4(0.2)    | 0.3(0.6)  |
| Brazil    | Belo Horizonte         | 1998-2010 | 22.9(61%) | 0.4(0.3)     | 1.6(0.3) | 0.6(0.2)    | 1.5(0.7)  |
| Brazil    | Brasilia               | 1997-2009 | 22.8(80%) | 0.4(0.0)     | 2.7(1.1) | 0.2(0.0)    | 1.7(0.6)  |
| Brazil    | Curitiba               | 1997-2010 | 21.3(80%) | 0.3(0.6)     | 4.6(0.4) | 0.3(0.2)    | 3.9(0.5)  |
| Brazil    | Fortaleza              | 1997-2010 | 26.9(42%) | 1.4(0.2)     | 1.8(0.2) | 0.4(0.2)    | 0.3(0.5)  |
| Brazil    | Goiania                | 1997-2009 | 24.2(46%) | 1.1(0.4)     | 1.1(0.8) | 0.9(0.1)    | 0.7(0.4)  |
| Brazil    | Manaus                 | 1997-2010 | 27.4(56%) | 0.8(0.3)     | 1.7(0.4) | 0.5(0.1)    | 0.7(0.7)  |
| Brazil    | Natal                  | 1997-2010 | 24.5(83%) | 0.3(0.3)     | 3.5(0.7) | 0.3(0.1)    | 5.0(0.3)  |
| Brazil    | Porto Alegre           | 1997-2010 | 24.1(80%) | 0.5(0.5)     | 6.5(0.5) | 0.3(0.1)    | 4.8(0.6)  |
| Brazil    | Recife                 | 1997-2010 | 25.6(38%) | 1.2(0.1)     | 0.8(0.4) | 0.8(0.1)    | 0.4(0.5)  |
| Brazil    | Sao Luis               | 1997-2010 | 26.9(46%) | 0.8(0.2)     | 1.3(0.4) | 0.4(0.1)    | 0.4(0.6)  |
| Brazil    | Salvador               | 1997-2010 | 26.9(77%) | 0.2(0.1)     | 2.6(0.3) | 0.1(0.1)    | 1.4(0.5)  |
| Brazil    | Sao Paulo              | 1997-2007 | 21.6(61%) | 0.7(0.7)     | 3.9(0.7) | 0.8(0.2)    | 2.1(0.6)  |
| Brazil    | Teresina               | 1997-2010 | 28.0(67%) | 0.8(0.6)     | 2.5(0.8) | 0.5(0.2)    | 0.9(0.4)  |
| Brazil    | Vitoria                | 1997-2008 | 26.7(74%) | 0.4(0.4)     | 2.7(0.5) | 0.3(0.2)    | 2.2(0.1)  |
| Canada    | Abbotsford             | 1986-2008 | 17.7(86%) | 0.2(0.3)     | 2.6(0.4) | 0.3(0.2)    | 7.3(0.7)  |
| Canada    | Calgary                | 1986-2010 | 15.1(84%) | 0.2(0.4)     | 3.9(0.5) | 0.4(0.2)    | 11.1(0.5) |
| Canada    | Edmonton               | 1986-2010 | 15.2(80%) | 0.4(0.1)     | 5.7(0.4) | 0.6(0.1)    | 11.9(0.6) |
| Canada    | Halifax                | 1986-2010 | 16.5(80%) | 0.5(0.1)     | 5.0(1.3) | 0.6(0.0)    | 10.4(0.6) |
| Canada    | Hamilton               | 1986-2010 | 18.3(79%) | 0.5(0.2)     | 4.1(0.3) | 0.7(0.1)    | 10.9(0.2) |
| Canada    | Kingston               | 1986-2005 | 18.3(80%) | 0.6(0.3)     | 5.2(0.4) | 0.7(0.2)    | 11.3(0.7) |
| Canada    | Kitchener-<br>Waterloo | 1986-2008 | 18.0(82%) | 0.6(0.0)     | 5.6(1.0) | 0.6(0.0)    | 11.4(0.6) |
| Canada    | London Ontario         | 1986-2010 | 18.6(80%) | 0.7(1.0)     | 5.3(1.1) | 0.6(0.1)    | 11.1(0.8) |
| Canada    | Niagara                | 1986-2010 | 19.3(79%) | 0.7(0.3)     | 7.0(0.3) | 0.6(0.2)    | 10.7(0.6) |
| Canada    | Oshawa                 | 1995-2009 | 18.0(80%) | 0.6(0.6)     | 5.6(0.6) | 0.6(0.2)    | 11.0(0.6) |
| Canada    | Ottawa                 | 1986-2010 | 18.4(80%) | 0.6(0.2)     | 5.4(0.5) | 0.7(0.2)    | 12.4(0.6) |
| Canada    | Regina                 | 1986-2008 | 16.6(82%) | 0.6(0.1)     | 6.1(0.5) | 0.6(0.1)    | 14.2(0.5) |
| Canada    | Sudbury                | 1986-2008 | 16.8(81%) | 0.6(0.3)     | 5.8(0.6) | 0.6(0.2)    | 13.1(0.2) |
| Canada    | Saint John NB          | 1986-2008 | 16.3(86%) | 0.2(0.2)     | 4.8(0.3) | 0.3(0.1)    | 11.4(0.1) |
| Canada    | St. John's NFL         | 1986-2008 | 16.5(90%) | 0.5(0.2)     | 5.1(0.3) | 0.2(0.1)    | 11.6(0.6) |
| Canada    | Saskatoon              | 1986-2005 | 16.1(82%) | 0.6(0.0)     | 5.4(0.2) | 0.6(0.0)    | 14.0(0.5) |
| Canada    | Thunder Bay            | 1986-2008 | 15.2(81%) | 0.6(0.5)     | 6.0(0.9) | 0.6(0.2)    | 12.9(0.4) |
| Canada    | Victoria               | 1986-2010 | 16.2(86%) | 0.2(0.6)     | 2.8(0.7) | 0.3(0.2)    | 6.3(0.4)  |
| Canada    | Vancouver              | 1986-2010 | 16.7(82%) | 0.3(0.5)     | 4.8(0.6) | 0.4(0.2)    | 6.5(0.5)  |
| Canada    | Windsor                | 1986-2008 | 20.2(78%) | 0.6(0.3)     | 4.9(0.4) | 0.7(0.1)    | 10.8(0.9) |
| Canada    | Winnipeg               | 1986-2010 | 17.0(80%) | 0.6(0.1)     | 5.7(0.9) | 0.7(0.1)    | 14.5(0.7) |

|         |           |           |           |           |           |          |           |
|---------|-----------|-----------|-----------|-----------|-----------|----------|-----------|
| Ireland | NI W      | 1984-2006 | 18.3(98%) | 0.0(0.0)  | 11.9(0.4) | 0.0(0.1) | 8.7(0.6)  |
| Ireland | NI E      | 1984-2006 | 16.8(97%) | 0.1(0.2)  | 11.9(0.3) | 0.0(0.2) | 7.7(0.6)  |
| Ireland | Rep I NE  | 1984-2006 | 17.8(97%) | 0.0(0.1)  | 10.2(0.2) | 0.0(0.1) | 8.0(1.0)  |
| Ireland | Rep I SE  | 1984-2006 | 18.2(98%) | -0.0(0.2) | 13.4(0.3) | 0.0(0.1) | 8.5(0.7)  |
| Ireland | Rep I NW  | 1984-2006 | 16.5(96%) | 0.1(0.3)  | 10.4(0.3) | 0.0(0.2) | 6.9(0.7)  |
| Ireland | Rep I SW  | 1984-2006 | 17.2(97%) | 0.0(0.2)  | 9.7(0.3)  | 0.0(0.2) | 6.7(0.6)  |
| Italy   | Rome      | 1988-2009 | 22.1(78%) | 1.6(0.3)  | 10.1(0.3) | 0.6(0.1) | 7.3(0.8)  |
| Italy   | Viterbo   | 1995-2005 | 21.5(79%) | 2.0(0.2)  | 9.1(0.3)  | 0.7(0.1) | 7.8(0.5)  |
| Japan   | Aichi     | 1972-2011 | 24.8(82%) | 0.6(0.5)  | 10.7(0.9) | 0.5(0.2) | 9.6(0.5)  |
| Japan   | Akita     | 1972-2011 | 22.7(87%) | 0.5(0.2)  | 12.0(0.6) | 0.3(0.1) | 11.4(0.4) |
| Japan   | Aomori    | 1972-2011 | 22.1(90%) | 0.6(0.5)  | 9.2(0.9)  | 0.2(0.2) | 12.1(0.5) |
| Japan   | Chiba     | 1972-2011 | 26.4(90%) | 0.2(0.6)  | 9.4(0.6)  | 0.2(0.2) | 10.9(0.5) |
| Japan   | Ehime     | 1972-2011 | 25.4(83%) | 0.2(0.3)  | 9.3(0.2)  | 0.4(0.1) | 9.5(0.5)  |
| Japan   | Fukushima | 1972-2011 | 25.3(91%) | 0.5(0.6)  | 11.5(0.3) | 0.2(0.2) | 12.5(0.5) |
| Japan   | Fukuoka   | 1972-2011 | 25.0(81%) | 0.5(0.0)  | 9.0(1.0)  | 0.5(0.0) | 8.7(0.5)  |
| Japan   | Fukui     | 1972-2011 | 24.2(83%) | 0.4(0.2)  | 10.9(0.4) | 0.5(0.2) | 10.2(0.9) |
| Japan   | Gifu      | 1972-2011 | 25.9(85%) | 0.4(0.2)  | 10.5(0.4) | 0.3(0.2) | 10.5(0.6) |
| Japan   | Gunma     | 1972-2011 | 23.9(83%) | 0.5(0.2)  | 10.9(0.2) | 0.5(0.2) | 9.9(0.5)  |
| Japan   | Hokkaido  | 1972-2011 | 21.9(92%) | 0.3(0.3)  | 8.1(0.3)  | 0.2(0.1) | 13.2(0.8) |
| Japan   | Hiroshima | 1972-2011 | 24.6(81%) | 0.5(0.1)  | 10.4(0.4) | 0.5(0.1) | 9.2(0.5)  |
| Japan   | Hyogo     | 1972-2011 | 24.9(81%) | 0.2(0.2)  | 9.2(0.3)  | 0.5(0.2) | 9.2(0.7)  |
| Japan   | Ibaraki   | 1972-2011 | 24.8(90%) | 0.2(0.2)  | 10.7(0.8) | 0.2(0.1) | 11.4(0.4) |
| Japan   | Ishikawa  | 1972-2011 | 23.9(83%) | 0.7(0.2)  | 11.2(0.4) | 0.5(0.2) | 9.8(1.3)  |
| Japan   | Iwate     | 1972-2011 | 23.0(91%) | 0.5(0.2)  | 12.5(0.9) | 0.2(0.2) | 13.0(0.6) |
| Japan   | Kagawa    | 1972-2011 | 24.7(80%) | 0.6(0.2)  | 11.8(0.4) | 0.6(0.2) | 9.1(0.7)  |
| Japan   | Kagoshima | 1972-2011 | 25.7(78%) | 0.4(0.3)  | 10.0(0.3) | 0.5(0.1) | 7.9(0.7)  |
| Japan   | Kumamoto  | 1972-2011 | 25.4(80%) | 0.2(0.2)  | 9.8(0.7)  | 0.5(0.1) | 9.0(0.4)  |
| Japan   | Kanagawa  | 1972-2011 | 26.1(89%) | 0.3(0.4)  | 10.0(0.8) | 0.2(0.1) | 10.5(0.6) |
| Japan   | Kochi     | 1972-2011 | 27.2(90%) | 0.1(0.3)  | 8.9(0.3)  | 0.1(0.1) | 10.4(0.7) |
| Japan   | Kyoto     | 1972-2011 | 24.9(81%) | 0.6(0.1)  | 10.5(0.3) | 0.5(0.1) | 9.6(0.5)  |
| Japan   | Mie       | 1972-2011 | 24.5(81%) | 0.4(0.4)  | 11.1(0.5) | 0.5(0.1) | 9.2(0.1)  |
| Japan   | Miyagi    | 1972-2011 | 24.2(92%) | 0.2(0.1)  | 12.0(0.4) | 0.1(0.1) | 12.0(0.4) |
| Japan   | Miyazaki  | 1972-2011 | 25.4(80%) | 0.5(0.0)  | 10.9(0.4) | 0.4(0.2) | 8.3(0.3)  |
| Japan   | Nagano    | 1972-2011 | 24.9(91%) | 0.3(0.0)  | 12.5(0.4) | 0.1(0.2) | 13.2(0.4) |
| Japan   | Nara      | 1972-2011 | 23.9(81%) | 0.5(0.2)  | 10.3(0.4) | 0.5(0.2) | 9.6(0.7)  |
| Japan   | Nagasaki  | 1972-2011 | 25.2(81%) | 0.2(0.2)  | 9.1(0.8)  | 0.5(0.2) | 8.5(0.5)  |
| Japan   | Niigata   | 1972-2011 | 23.3(83%) | 0.7(0.2)  | 11.8(0.7) | 0.5(0.2) | 10.0(0.5) |
| Japan   | Oita      | 1972-2011 | 27.1(91%) | 0.3(0.3)  | 10.1(0.3) | 0.1(0.1) | 10.9(0.8) |
| Japan   | Okinawa   | 1973-2011 | 26.2(68%) | 0.2(0.8)  | 6.5(0.7)  | 0.6(0.2) | 3.9(0.4)  |
| Japan   | Okayama   | 1972-2011 | 27.9(91%) | 0.1(0.3)  | 11.3(0.8) | 0.1(0.1) | 12.2(0.6) |
| Japan   | Osaka     | 1972-2011 | 25.3(80%) | 0.7(0.9)  | 9.3(0.6)  | 0.6(0.2) | 9.1(0.5)  |
| Japan   | Saga      | 1972-2011 | 24.9(80%) | 0.6(0.2)  | 11.1(0.3) | 0.5(0.2) | 8.9(0.1)  |
| Japan   | Saitama   | 1972-2011 | 24.1(83%) | 0.5(0.6)  | 11.6(0.5) | 0.5(0.2) | 9.7(0.5)  |
| Japan   | Shiga     | 1972-2011 | 24.1(82%) | 0.3(0.2)  | 11.4(0.4) | 0.5(0.1) | 9.9(0.6)  |
| Japan   | Shimane   | 1972-2011 | 23.8(83%) | 0.3(0.1)  | 10.6(0.4) | 0.5(0.1) | 9.5(0.6)  |
| Japan   | Shizuoka  | 1972-2011 | 26.9(91%) | 0.2(0.1)  | 11.0(0.3) | 0.1(0.1) | 10.5(0.8) |

|         |             |           |           |           |           |          |           |
|---------|-------------|-----------|-----------|-----------|-----------|----------|-----------|
| Japan   | Tochigi     | 1972-2011 | 25.3(90%) | 0.4(0.3)  | 10.7(0.9) | 0.2(0.2) | 11.8(0.6) |
| Japan   | Tokushima   | 1972-2011 | 25.2(82%) | 0.3(0.5)  | 9.1(0.3)  | 0.4(0.1) | 9.1(0.5)  |
| Japan   | Tokyo       | 1972-2011 | 25.9(86%) | 0.4(0.2)  | 8.7(0.3)  | 0.3(0.1) | 10.0(0.6) |
| Japan   | Toyama      | 1972-2011 | 23.2(82%) | 0.6(0.2)  | 10.7(0.2) | 0.6(0.1) | 9.8(0.6)  |
| Japan   | Tottori     | 1972-2011 | 24.1(83%) | 0.5(0.3)  | 11.2(0.3) | 0.5(0.2) | 9.8(0.7)  |
| Japan   | Wakayama    | 1972-2011 | 24.7(79%) | 0.8(0.0)  | 12.3(0.4) | 0.6(0.0) | 8.7(0.4)  |
| Japan   | Yamaguchi   | 1972-2011 | 23.9(80%) | 0.7(0.2)  | 10.4(0.3) | 0.6(0.1) | 9.1(0.7)  |
| Japan   | Yamagata    | 1972-2011 | 23.6(88%) | 0.5(0.3)  | 11.8(1.0) | 0.3(0.2) | 12.2(0.7) |
| Japan   | Yamanashi   | 1972-2011 | 24.8(85%) | 0.3(0.3)  | 10.9(0.3) | 0.3(0.1) | 10.6(0.6) |
| S Korea | Busan       | 1993-2009 | 28.1(98%) | -0.0(0.1) | 6.6(0.4)  | 0.0(0.2) | 13.1(0.5) |
| S Korea | Daegu       | 1992-2009 | 26.9(91%) | 0.3(0.4)  | 5.1(0.8)  | 0.2(0.2) | 12.5(0.4) |
| S Korea | Daejeon     | 1992-2009 | 24.1(85%) | 0.6(0.7)  | 7.6(0.5)  | 0.3(0.2) | 11.4(0.5) |
| S Korea | Gwangju     | 1992-2009 | 25.9(90%) | 0.5(0.1)  | 6.9(0.9)  | 0.2(0.2) | 12.0(0.7) |
| S Korea | Incheon     | 1992-2009 | 24.1(88%) | 0.2(0.2)  | 6.4(0.9)  | 0.2(0.1) | 11.8(0.6) |
| S Korea | Seoul       | 1992-2009 | 24.2(85%) | 0.5(0.2)  | 7.6(0.3)  | 0.3(0.1) | 11.7(0.5) |
| S Korea | Ulsan       | 1997-2009 | 25.9(91%) | 0.3(0.2)  | 5.8(0.3)  | 0.2(0.1) | 11.5(0.7) |
| Spain   | A Coruna    | 1990-2009 | 18.7(80%) | 0.5(0.4)  | 5.1(0.8)  | 0.3(0.2) | 4.0(0.5)  |
| Spain   | Albacete    | 1990-2009 | 22.0(78%) | 1.4(0.4)  | 6.3(0.5)  | 0.7(0.1) | 8.3(0.6)  |
| Spain   | Alicante    | 1990-2009 | 23.6(76%) | 0.9(0.6)  | 6.0(0.5)  | 0.6(0.2) | 5.7(0.4)  |
| Spain   | Almeria     | 1990-2008 | 24.1(77%) | 0.9(0.1)  | 5.7(0.4)  | 0.6(0.1) | 5.6(0.5)  |
| Spain   | Avila       | 1990-2009 | 18.5(80%) | 1.3(0.2)  | 6.3(0.4)  | 0.6(0.2) | 7.9(0.6)  |
| Spain   | Badajoz     | 1990-2009 | 23.7(78%) | 1.3(0.3)  | 6.1(1.0)  | 0.7(0.2) | 7.2(0.6)  |
| Spain   | Bilbao      | 1990-2009 | 19.6(80%) | 0.7(0.2)  | 4.1(1.3)  | 0.5(0.1) | 5.4(0.6)  |
| Spain   | Barcelona   | 1990-2009 | 24.7(90%) | 0.6(0.3)  | 6.3(0.6)  | 0.1(0.1) | 8.5(0.2)  |
| Spain   | Burgos      | 1990-2009 | 17.8(81%) | 1.1(0.1)  | 6.1(1.0)  | 0.6(0.2) | 7.5(0.6)  |
| Spain   | Cadiz       | 1990-2007 | 22.8(78%) | 1.1(0.3)  | 5.4(0.4)  | 0.5(0.2) | 4.7(0.8)  |
| Spain   | Caceres     | 1990-2009 | 23.2(78%) | 1.4(0.2)  | 6.6(0.7)  | 0.8(0.1) | 7.6(0.6)  |
| Spain   | Ciudad Real | 1990-2009 | 23.6(78%) | 1.6(0.2)  | 7.2(0.4)  | 0.7(0.2) | 8.6(0.8)  |
| Spain   | Cordoba     | 1990-2009 | 25.0(77%) | 1.4(0.3)  | 7.2(0.3)  | 0.7(0.1) | 7.4(0.5)  |
| Spain   | Castellon   | 1990-2008 | 23.3(76%) | 0.9(0.1)  | 5.9(1.0)  | 0.6(0.1) | 6.0(0.6)  |
| Spain   | Cuenca      | 1990-2009 | 20.6(78%) | 1.6(0.3)  | 6.0(0.3)  | 0.7(0.2) | 8.0(0.7)  |
| Spain   | Guadalajara | 1992-2009 | 20.4(78%) | 1.6(0.2)  | 6.0(0.7)  | 0.7(0.2) | 7.6(0.5)  |
| Spain   | Girona      | 1990-2007 | 21.0(78%) | 1.2(0.4)  | 5.5(0.6)  | 0.6(0.2) | 6.8(0.5)  |
| Spain   | Granada     | 1990-2009 | 23.0(78%) | 1.4(0.6)  | 6.1(0.5)  | 0.7(0.2) | 8.0(0.5)  |
| Spain   | Huelva      | 1990-2009 | 23.6(78%) | 1.0(0.1)  | 5.8(0.5)  | 0.6(0.2) | 5.9(0.4)  |
| Spain   | Huesca      | 1990-2009 | 21.2(79%) | 1.3(0.8)  | 5.3(0.6)  | 0.7(0.2) | 7.8(0.5)  |
| Spain   | Jaen        | 1990-2008 | 24.0(78%) | 1.4(0.2)  | 5.7(0.2)  | 0.8(0.1) | 7.7(0.7)  |
| Spain   | Leon        | 1990-2009 | 17.7(80%) | 1.1(0.3)  | 6.8(0.8)  | 0.6(0.1) | 7.2(0.4)  |
| Spain   | Logrono     | 1990-2009 | 20.7(80%) | 1.1(0.3)  | 5.0(0.2)  | 0.6(0.2) | 7.3(0.7)  |
| Spain   | Lleida      | 1990-2009 | 22.4(78%) | 1.5(0.2)  | 5.0(0.4)  | 0.7(0.2) | 7.9(0.6)  |
| Spain   | Lugo        | 1990-2009 | 17.2(81%) | 0.7(0.2)  | 6.5(0.3)  | 0.5(0.2) | 5.7(0.5)  |
| Spain   | Malaga      | 1990-2009 | 23.3(75%) | 1.1(0.1)  | 5.7(0.3)  | 0.7(0.1) | 5.3(0.5)  |
| Spain   | Madrid      | 1990-2009 | 21.9(76%) | 1.4(0.1)  | 4.2(0.3)  | 0.9(0.2) | 7.6(0.5)  |
| Spain   | Melilla     | 1990-2009 | 23.7(78%) | 0.7(0.3)  | 4.9(0.8)  | 0.5(0.1) | 5.2(0.5)  |
| Spain   | Murcia      | 1990-2009 | 23.3(76%) | 0.6(0.4)  | 4.4(0.8)  | 0.5(0.1) | 4.8(0.4)  |
| Spain   | Ourense     | 1990-2009 | 20.5(78%) | 0.9(0.6)  | 5.6(0.8)  | 0.6(0.3) | 6.1(0.3)  |

|        |                         |           |           |          |          |          |           |
|--------|-------------------------|-----------|-----------|----------|----------|----------|-----------|
| Spain  | Oviedo                  | 1990-2009 | 18.0(80%) | 0.6(0.3) | 6.0(0.5) | 0.4(0.1) | 5.1(0.7)  |
| Spain  | Palmas G. Canaria       | 1990-2009 | 22.6(64%) | 0.6(0.6) | 3.5(0.5) | 0.6(0.2) | 1.9(0.5)  |
| Spain  | Palma Mallorca          | 1990-2009 | 22.6(77%) | 1.0(0.3) | 6.3(0.3) | 0.6(0.1) | 6.5(0.9)  |
| Spain  | Pamplona                | 1990-2009 | 19.7(81%) | 0.9(0.1) | 3.9(0.3) | 0.6(0.2) | 7.2(0.3)  |
| Spain  | Pontevedra              | 1990-2009 | 19.0(79%) | 0.8(0.2) | 6.7(1.0) | 0.5(0.2) | 4.7(0.6)  |
| Spain  | Segovia                 | 1990-2009 | 19.8(80%) | 1.3(0.2) | 6.1(0.8) | 0.7(0.1) | 8.1(0.6)  |
| Spain  | Salamanca               | 1990-2009 | 19.2(79%) | 1.0(0.1) | 5.4(1.1) | 0.6(0.0) | 7.6(0.5)  |
| Spain  | San Sebastian           | 1990-2009 | 18.5(81%) | 0.7(0.2) | 3.2(0.5) | 0.4(0.1) | 5.3(0.3)  |
| Spain  | Santander               | 1990-2009 | 19.0(79%) | 0.6(0.1) | 4.3(0.5) | 0.4(0.1) | 4.8(0.4)  |
| Spain  | Soria                   | 1990-2009 | 18.3(80%) | 1.3(0.3) | 5.9(0.7) | 0.6(0.2) | 7.7(0.3)  |
| Spain  | Sevilla                 | 1990-2009 | 25.7(77%) | 1.5(0.3) | 7.7(0.4) | 0.7(0.2) | 6.9(0.7)  |
| Spain  | Teruel                  | 1990-2009 | 19.3(78%) | 1.7(0.1) | 5.5(0.4) | 0.7(0.2) | 7.8(0.6)  |
| Spain  | Tenerife                | 1990-2009 | 23.8(72%) | 0.7(0.3) | 3.7(0.5) | 0.4(0.2) | 2.6(1.0)  |
| Spain  | Toledo                  | 1990-2009 | 23.4(77%) | 1.4(0.1) | 5.6(0.4) | 0.8(0.1) | 8.3(0.5)  |
| Spain  | Tarragona               | 1990-2009 | 23.8(77%) | 1.2(0.3) | 5.0(0.7) | 0.6(0.2) | 6.6(0.3)  |
| Spain  | Vitoria                 | 1990-2009 | 17.8(81%) | 0.8(0.3) | 5.2(1.1) | 0.5(0.1) | 6.5(0.5)  |
| Spain  | Valladolid              | 1990-2009 | 20.0(79%) | 1.2(0.2) | 6.8(0.7) | 0.7(0.1) | 7.8(0.6)  |
| Spain  | Valencia                | 1990-2009 | 24.0(78%) | 0.8(0.2) | 7.0(0.7) | 0.5(0.2) | 6.0(0.5)  |
| Spain  | Zamora                  | 1990-2009 | 20.3(79%) | 1.3(0.2) | 5.9(0.3) | 0.6(0.1) | 7.7(0.6)  |
| Spain  | Zaragoza                | 1990-2009 | 22.6(78%) | 1.3(0.1) | 4.7(0.2) | 0.7(0.1) | 7.7(0.3)  |
| Taiwan | Kaohsiung               | 1994-2006 | 25.6(44%) | 1.3(0.1) | 2.8(0.8) | 1.4(0.1) | 1.8(0.5)  |
| Taiwan | Taipei                  | 1994-2006 | 25.8(62%) | 0.7(0.3) | 4.7(0.5) | 1.1(0.2) | 3.7(0.7)  |
| Taiwan | Taichung                | 1994-2006 | 26.0(60%) | 0.6(0.4) | 3.9(0.7) | 0.9(0.2) | 3.2(0.6)  |
| UK     | East                    | 1993-2005 | 18.3(92%) | 0.3(0.2) | 8.6(0.6) | 0.2(0.1) | 7.9(0.4)  |
| UK     | East Midlands           | 1993-2005 | 17.3(91%) | 0.3(0.2) | 8.3(0.6) | 0.2(0.1) | 7.4(0.4)  |
| UK     | London                  | 1993-2005 | 19.5(92%) | 0.5(0.2) | 9.4(0.3) | 0.2(0.2) | 7.9(0.6)  |
| UK     | North East              | 1993-2005 | 15.9(90%) | 0.4(0.3) | 7.2(0.3) | 0.2(0.1) | 6.6(0.6)  |
| UK     | North West              | 1993-2005 | 16.2(88%) | 0.3(0.3) | 8.2(0.3) | 0.3(0.2) | 6.2(0.6)  |
| UK     | South East              | 1993-2005 | 17.9(91%) | 0.3(0.4) | 8.6(0.4) | 0.2(0.2) | 7.2(0.6)  |
| UK     | South West              | 1993-2005 | 16.3(86%) | 0.3(0.1) | 9.2(0.5) | 0.3(0.1) | 5.8(0.4)  |
| UK     | Wales                   | 1993-2005 | 16.5(89%) | 0.3(0.2) | 9.1(0.9) | 0.2(0.1) | 6.2(0.6)  |
| UK     | West Midlands           | 1993-2005 | 17.4(92%) | 0.2(0.2) | 7.9(0.3) | 0.2(0.1) | 7.5(0.7)  |
| UK     | Yorkshire & Humber      | 1993-2005 | 16.4(89%) | 0.3(0.1) | 7.7(0.4) | 0.2(0.1) | 6.7(0.5)  |
| USA    | Akron, OH               | 1985-2005 | 21.9(87%) | 0.4(0.2) | 6.7(1.3) | 0.3(0.2) | 12.1(0.4) |
| USA    | Albuquerque, NM         | 1985-2005 | 24.2(83%) | 0.3(0.1) | 5.5(1.2) | 0.4(0.1) | 10.3(0.8) |
| USA    | Allentown-Bethlehem, PA | 1986-2005 | 22.5(86%) | 0.4(0.3) | 6.5(0.3) | 0.3(0.2) | 11.9(0.8) |
| USA    | Austin, TX              | 1985-2005 | 28.3(79%) | 0.2(0.1) | 3.7(0.3) | 0.3(0.1) | 7.9(0.4)  |
| USA    | Atlantic City, NJ       | 1985-2005 | 22.8(84%) | 0.5(0.0) | 6.7(0.3) | 0.5(0.0) | 11.1(0.6) |
| USA    | Atlanta, GA             | 1985-2005 | 25.6(81%) | 0.1(0.4) | 4.7(0.9) | 0.3(0.2) | 8.7(0.5)  |
| USA    | Buffalo, NY             | 1985-2005 | 21.1(86%) | 0.5(0.3) | 8.5(0.6) | 0.3(0.2) | 12.2(0.5) |
| USA    | Bakersfield, CA         | 1985-2005 | 29.2(92%) | 0.2(0.3) | 4.7(0.3) | 0.2(0.2) | 11.0(0.9) |
| USA    | Baltimore, MD           | 1985-2005 | 23.9(83%) | 0.5(0.2) | 6.7(0.2) | 0.4(0.2) | 11.1(0.8) |
| USA    | Bergen-Passaic, NJ      | 1985-2005 | 23.9(83%) | 0.4(0.3) | 7.2(0.8) | 0.5(0.1) | 11.3(0.5) |



|     |                                   |           |           |          |          |          |           |
|-----|-----------------------------------|-----------|-----------|----------|----------|----------|-----------|
| USA | Birmingham, AL                    | 1985-2005 | 25.6(79%) | 0.3(0.3) | 5.6(1.4) | 0.4(0.2) | 8.7(0.5)  |
| USA | Baton Rouge, LA                   | 1985-2005 | 26.9(77%) | 0.3(0.2) | 4.6(0.5) | 0.3(0.2) | 7.2(0.7)  |
| USA | Boston, MA                        | 1985-2005 | 21.9(86%) | 0.4(0.1) | 8.2(0.2) | 0.4(0.2) | 11.4(0.4) |
| USA | Chicago, IL                       | 1985-2005 | 24.7(93%) | 0.4(0.5) | 8.1(0.8) | 0.1(0.2) | 14.8(0.4) |
| USA | Charlotte, NC                     | 1985-2005 | 26.9(91%) | 0.0(0.4) | 4.8(0.3) | 0.1(0.2) | 10.8(0.5) |
| USA | Chattanooga, TN                   | 1985-2005 | 25.0(80%) | 0.2(0.2) | 4.2(0.3) | 0.4(0.1) | 9.3(0.3)  |
| USA | Columbus, OH                      | 1985-2005 | 23.3(86%) | 0.4(0.4) | 5.8(0.8) | 0.3(0.2) | 11.8(0.4) |
| USA | Cleveland, OH                     | 1985-2005 | 21.9(86%) | 0.4(0.2) | 7.5(0.5) | 0.4(0.1) | 11.8(0.3) |
| USA | Cincinnati, OH                    | 1985-2005 | 23.1(82%) | 0.4(0.2) | 6.2(0.4) | 0.4(0.1) | 10.7(0.5) |
| USA | Canton-Massillon,<br>OH           | 1985-2005 | 22.8(90%) | 0.3(0.3) | 5.7(0.3) | 0.2(0.1) | 12.9(0.7) |
| USA | Columbia, SC                      | 1985-2005 | 26.4(81%) | 0.4(0.3) | 5.2(0.4) | 0.4(0.1) | 9.0(0.8)  |
| USA | Des Moines, IA                    | 1985-2005 | 22.5(82%) | 0.4(0.0) | 7.5(1.2) | 0.5(0.0) | 12.6(0.5) |
| USA | Dallas, TX                        | 1985-2005 | 27.8(79%) | 0.4(0.2) | 4.3(0.3) | 0.5(0.1) | 9.2(0.5)  |
| USA | Denver, CO                        | 1985-2005 | 21.1(82%) | 0.5(0.3) | 5.2(0.2) | 0.5(0.2) | 11.1(0.1) |
| USA | Detroit, MI                       | 1985-2005 | 23.9(91%) | 0.4(0.3) | 6.9(0.3) | 0.2(0.2) | 13.9(1.2) |
| USA | Daytona Beach, FL                 | 1985-2005 | 26.9(78%) | 0.1(0.2) | 2.5(0.3) | 0.2(0.1) | 5.4(0.5)  |
| USA | Dayton, OH                        | 1985-2005 | 22.2(82%) | 0.4(0.9) | 6.4(0.7) | 0.5(0.2) | 11.3(0.4) |
| USA | El Paso, TX                       | 1985-2005 | 27.5(85%) | 0.2(0.0) | 4.8(0.3) | 0.3(0.1) | 9.6(0.5)  |
| USA | Erie, PA                          | 1985-2005 | 23.1(91%) | 0.4(0.2) | 7.0(0.9) | 0.2(0.2) | 13.1(0.5) |
| USA | Flint, MI                         | 1985-2005 | 22.5(91%) | 0.5(0.3) | 6.8(0.9) | 0.2(0.2) | 13.9(0.6) |
| USA | Fresno, CA                        | 1985-2005 | 26.9(84%) | 0.1(0.1) | 4.7(0.4) | 0.4(0.1) | 9.3(0.6)  |
| USA | Ft. Lauderdale, FL                | 1985-2005 | 26.1(64%) | 0.2(0.2) | 2.0(0.3) | 0.5(0.2) | 3.6(0.7)  |
| USA | Fort Myers-Cape<br>Coral, FL      | 1985-2005 | 24.2(44%) | 0.4(0.3) | 1.7(0.3) | 1.7(0.2) | 2.0(0.8)  |
| USA | Fort Pierce-Port<br>St. Lucie, FL | 1987-2005 | 23.9(48%) | 0.2(0.0) | 1.5(0.4) | 1.4(0.0) | 2.3(0.5)  |
| USA | Fort Worth-<br>Arlington, TX      | 1992-2005 | 27.8(80%) | 0.2(0.4) | 3.7(0.5) | 0.5(0.2) | 9.3(0.5)  |
| USA | Gary, IN                          | 1985-2005 | 23.9(91%) | 0.3(0.4) | 6.8(0.3) | 0.2(0.2) | 14.1(0.5) |
| USA | Greensboro, NC                    | 1985-2005 | 26.4(93%) | 0.3(0.1) | 6.2(0.3) | 0.1(0.0) | 11.5(0.5) |
| USA | Greenville, SC                    | 1987-2004 | 24.7(81%) | 0.2(0.2) | 5.7(0.9) | 0.3(0.2) | 9.2(0.5)  |
| USA | Grand Rapids, MI                  | 1985-2005 | 22.8(91%) | 0.2(0.2) | 7.5(0.7) | 0.2(0.2) | 13.9(0.5) |
| USA | Honolulu, HI                      | 1985-1999 | 28.9(97%) | 0.0(0.2) | 2.7(0.4) | 0.0(0.2) | 3.4(0.5)  |
| USA | Harrisburg-<br>Carlisle, PA       | 1991-2005 | 24.2(88%) | 0.2(0.2) | 6.2(0.9) | 0.3(0.1) | 12.2(0.5) |
| USA | Hartford, CT                      | 1985-2005 | 21.4(84%) | 0.6(0.1) | 6.9(0.2) | 0.5(0.1) | 11.5(0.6) |
| USA | Houston, TX                       | 1985-2005 | 25.6(65%) | 0.1(0.2) | 3.3(0.2) | 1.0(0.1) | 5.7(0.7)  |
| USA | Indianapolis, IN                  | 1985-2005 | 23.6(86%) | 0.3(0.1) | 5.7(0.4) | 0.3(0.1) | 12.1(0.5) |
| USA | Jacksonville, FL                  | 1985-2005 | 26.7(77%) | 0.3(0.4) | 4.2(0.5) | 0.3(0.1) | 6.6(0.5)  |
| USA | Jersey City, NJ                   | 1985-2005 | 23.9(83%) | 0.4(0.2) | 6.9(0.2) | 0.5(0.1) | 11.3(0.7) |
| USA | Kansas City, MO-<br>KS            | 1985-2005 | 23.9(82%) | 0.4(0.3) | 6.3(0.5) | 0.5(0.1) | 11.7(0.1) |
| USA | Knoxville, TN                     | 1985-2005 | 24.2(80%) | 0.4(0.2) | 5.0(0.5) | 0.4(0.1) | 9.4(0.2)  |
| USA | Lakeland-Winter<br>Haven, FL      | 1985-2005 | 26.4(64%) | 0.3(0.3) | 2.8(0.4) | 0.6(0.1) | 3.9(0.5)  |
| USA | Lancaster, PA                     | 1985-2005 | 24.4(91%) | 0.2(0.3) | 6.1(0.7) | 0.2(0.1) | 13.0(0.4) |

|     |                                             |           |           |          |          |          |           |
|-----|---------------------------------------------|-----------|-----------|----------|----------|----------|-----------|
| USA | Louisville, KY                              | 1985-2005 | 24.2(80%) | 0.5(0.1) | 6.1(0.3) | 0.5(0.1) | 10.2(0.5) |
| USA | Little Rock, AR                             | 1985-2005 | 26.1(79%) | 0.4(0.6) | 4.8(0.5) | 0.5(0.2) | 9.5(0.5)  |
| USA | Los Angeles, CA                             | 1985-2005 | 22.8(95%) | 0.1(0.4) | 2.5(0.7) | 0.1(0.2) | 5.5(0.3)  |
| USA | Las Vegas, NV-AZ                            | 1985-2005 | 30.0(78%) | 0.4(0.2) | 4.3(0.3) | 0.6(0.1) | 10.3(0.7) |
| USA | Middlesex, NJ                               | 1985-2005 | 24.2(90%) | 0.4(0.3) | 7.6(0.3) | 0.2(0.1) | 12.6(0.6) |
| USA | Madison, WI                                 | 1987-2005 | 22.5(90%) | 0.3(0.0) | 6.8(0.3) | 0.2(0.3) | 14.4(0.4) |
| USA | Miami, FL                                   | 1985-2005 | 24.7(39%) | 0.8(0.3) | 1.1(0.3) | 1.8(0.2) | 1.4(1.1)  |
| USA | Melbourne-<br>Titusville-Palm<br>Bay, FL    | 1985-2005 | 26.4(70%) | 0.2(0.1) | 3.2(0.5) | 0.4(0.1) | 4.1(0.5)  |
| USA | Milwaukee, WI                               | 1985-2005 | 20.6(82%) | 0.6(0.3) | 9.0(0.9) | 0.6(0.1) | 12.0(0.4) |
| USA | Memphis, TN                                 | 1985-2005 | 26.4(79%) | 0.3(0.2) | 6.1(0.9) | 0.5(0.1) | 9.6(0.4)  |
| USA | Minneapolis-St.<br>Paul, MN                 | 1985-2005 | 21.9(86%) | 0.4(0.1) | 7.8(0.3) | 0.4(0.1) | 14.4(0.7) |
| USA | Mobile, AL                                  | 1985-2005 | 26.7(78%) | 0.1(0.2) | 3.2(0.3) | 0.3(0.1) | 7.2(0.6)  |
| USA | Nassau-Suffolk,<br>NY                       | 1985-2005 | 22.2(85%) | 0.3(0.2) | 8.4(0.4) | 0.4(0.1) | 11.2(0.5) |
| USA | Nashville, TN                               | 1985-2005 | 24.7(79%) | 0.5(0.6) | 6.2(1.0) | 0.5(0.2) | 9.6(0.5)  |
| USA | New Haven-<br>Meriden, CT                   | 1985-2005 | 21.7(85%) | 0.6(0.2) | 8.0(0.5) | 0.4(0.1) | 11.8(0.3) |
| USA | Newark, NJ                                  | 1985-2005 | 23.6(82%) | 0.6(0.3) | 6.3(0.2) | 0.5(0.2) | 11.0(0.7) |
| USA | New York, NY                                | 1985-2005 | 23.1(80%) | 0.9(0.1) | 7.0(0.5) | 0.6(0.1) | 10.4(0.6) |
| USA | Ocala, FL                                   | 1989-2004 | 26.7(73%) | 0.1(0.3) | 3.4(0.8) | 0.3(0.2) | 5.3(0.4)  |
| USA | Oklahoma City,<br>OK                        | 1985-2005 | 28.3(91%) | 0.2(0.0) | 5.2(0.5) | 0.1(0.1) | 12.5(0.4) |
| USA | Oakland, CA                                 | 1985-2005 | 20.8(95%) | 0.1(0.3) | 4.1(1.0) | 0.1(0.1) | 5.7(0.7)  |
| USA | Omaha, NE                                   | 1985-2005 | 23.1(83%) | 0.6(0.1) | 7.0(0.6) | 0.5(0.1) | 12.7(0.3) |
| USA | Orlando, FL                                 | 1985-2005 | 27.2(73%) | 0.2(0.1) | 2.3(0.3) | 0.3(0.1) | 4.8(0.4)  |
| USA | Orange County,<br>CA                        | 1985-2003 | 25.6(96%) | 0.0(0.8) | 2.3(0.5) | 0.0(0.2) | 7.0(0.5)  |
| USA | Philadelphia, PA-<br>NJ                     | 1985-2005 | 23.3(80%) | 0.5(0.3) | 7.7(0.2) | 0.6(0.2) | 10.5(0.9) |
| USA | Phoenix, AZ                                 | 1985-2005 | 29.2(65%) | 0.2(0.1) | 2.7(0.8) | 1.5(0.2) | 6.7(0.5)  |
| USA | Pensacola, FL                               | 1985-2004 | 26.9(77%) | 0.3(0.4) | 4.7(1.3) | 0.3(0.2) | 7.2(0.6)  |
| USA | Portland, OR                                | 1985-2005 | 21.4(91%) | 0.4(0.3) | 6.5(0.5) | 0.2(0.1) | 9.0(0.6)  |
| USA | Pittsburgh, PA                              | 1985-2005 | 23.3(90%) | 0.4(0.5) | 6.3(0.6) | 0.2(0.2) | 12.5(0.5) |
| USA | Rochester, NY                               | 1985-2005 | 21.7(89%) | 0.4(0.3) | 7.2(0.4) | 0.3(0.2) | 12.8(0.7) |
| USA | Reading, PA                                 | 1985-2005 | 24.4(80%) | 0.5(0.3) | 4.9(0.7) | 0.5(0.2) | 9.2(0.6)  |
| USA | Raleigh, NC                                 | 1985-2005 | 25.3(84%) | 0.3(0.2) | 5.2(0.3) | 0.3(0.1) | 9.9(0.6)  |
| USA | Riverside-San<br>Bernardino, CA             | 1985-2005 | 28.3(95%) | 0.0(0.6) | 2.9(0.6) | 0.1(0.2) | 9.3(0.4)  |
| USA | Sacramento, CA                              | 1985-2005 | 25.3(92%) | 0.2(0.3) | 4.2(0.6) | 0.2(0.1) | 9.0(0.2)  |
| USA | Scranton--Wilkes-<br>Barre--Hazleton,<br>PA | 1985-2005 | 20.8(84%) | 0.3(0.3) | 7.2(0.8) | 0.4(0.2) | 11.3(0.5) |
| USA | San Diego, CA                               | 1985-2005 | 23.3(96%) | 0.1(0.1) | 3.6(0.4) | 0.1(0.1) | 5.7(0.7)  |
| USA | San Francisco, CA                           | 1985-2005 | 20.8(97%) | 0.1(0.1) | 3.6(0.2) | 0.1(0.1) | 6.3(0.4)  |
| USA | Shreveport, LA                              | 1985-2004 | 26.9(78%) | 0.3(0.2) | 5.1(0.3) | 0.4(0.1) | 8.4(0.9)  |

|     |                                            |           |           |          |          |          |           |
|-----|--------------------------------------------|-----------|-----------|----------|----------|----------|-----------|
| USA | San Jose, CA                               | 1985-2004 | 23.3(94%) | 0.2(0.1) | 3.1(0.2) | 0.1(0.1) | 7.1(0.4)  |
| USA | Salt Lake City, UT                         | 1985-2005 | 25.3(88%) | 0.3(0.3) | 5.9(0.6) | 0.3(0.1) | 13.8(0.3) |
| USA | San Antonio, TX                            | 1985-2005 | 30.0(89%) | 0.1(0.4) | 2.9(0.5) | 0.1(0.2) | 9.1(0.5)  |
| USA | Spokane, WA                                | 1985-2005 | 20.8(89%) | 0.4(0.5) | 6.8(0.7) | 0.3(0.2) | 12.3(0.5) |
| USA | Springfield, MA                            | 1985-2005 | 21.4(84%) | 0.6(0.4) | 7.9(1.0) | 0.5(0.2) | 11.5(0.5) |
| USA | Sarasota-<br>Bradenton, FL                 | 1985-2005 | 23.9(47%) | 0.3(0.2) | 1.6(0.3) | 1.8(0.1) | 2.4(0.5)  |
| USA | Stockton-Lodi, CA                          | 1985-2005 | 25.6(90%) | 0.2(0.1) | 5.9(0.3) | 0.2(0.0) | 9.1(0.5)  |
| USA | St. Louis, MO-IL                           | 1985-2005 | 27.2(91%) | 0.3(0.2) | 5.6(0.4) | 0.2(0.1) | 13.4(0.6) |
| USA | Stamford-<br>Norwalk, CT                   | 1985-2005 | 22.5(86%) | 0.4(1.9) | 7.1(1.0) | 0.3(0.4) | 11.5(0.6) |
| USA | Seattle, WA                                | 1985-2005 | 20.0(93%) | 0.3(0.2) | 6.5(0.9) | 0.1(0.1) | 8.6(0.4)  |
| USA | Syracuse, NY                               | 1985-2005 | 21.1(86%) | 0.5(0.2) | 6.7(0.2) | 0.4(0.2) | 12.3(0.7) |
| USA | Tacoma, WA                                 | 1985-2003 | 20.3(94%) | 0.1(0.2) | 6.4(0.8) | 0.1(0.2) | 8.4(0.5)  |
| USA | Tampa-St.<br>Petersburg-<br>Clearwater, FL | 1985-2005 | 25.0(54%) | 0.2(0.3) | 2.5(0.3) | 1.2(0.1) | 3.2(0.6)  |
| USA | Tucson, AZ                                 | 1985-2005 | 28.9(78%) | 0.2(0.3) | 4.0(0.3) | 0.5(0.2) | 8.3(0.7)  |
| USA | Toledo, OH                                 | 1985-2005 | 21.4(83%) | 0.5(0.2) | 7.4(0.3) | 0.5(0.2) | 11.7(1.2) |
| USA | Trenton, NJ                                | 1985-2005 | 24.2(90%) | 0.3(0.1) | 6.6(0.3) | 0.2(0.2) | 12.6(0.3) |
| USA | Tulsa, OK                                  | 1985-2005 | 27.2(85%) | 0.1(0.3) | 5.5(0.3) | 0.4(0.1) | 11.5(0.6) |
| USA | Utica-Rome, NY                             | 1985-2004 | 21.9(91%) | 0.4(0.3) | 7.2(0.3) | 0.2(0.1) | 13.8(0.6) |
| USA | Ventura County,<br>CA                      | 1985-2002 | 21.7(96%) | 0.1(0.2) | 3.1(0.7) | 0.0(0.1) | 5.5(0.4)  |
| USA | Virginia Beach, VA                         | 1985-2005 | 25.0(81%) | 0.3(0.3) | 5.0(0.9) | 0.4(0.2) | 9.5(0.6)  |
| USA | Wichita, KS                                | 1985-2005 | 25.0(81%) | 0.4(0.3) | 5.3(0.7) | 0.5(0.1) | 11.6(0.6) |
| USA | Wilmington, DE                             | 1985-2005 | 23.6(84%) | 0.5(0.2) | 6.4(0.8) | 0.4(0.1) | 11.2(0.6) |
| USA | West Palm Beach-<br>Boca Raton, FL         | 1985-2005 | 24.4(42%) | 0.7(0.2) | 1.3(0.3) | 1.6(0.2) | 1.7(0.7)  |
| USA | Worcester, MA                              | 1985-2005 | 20.0(85%) | 0.6(0.3) | 7.6(0.4) | 0.4(0.1) | 11.6(0.8) |
| USA | Washington, DC-<br>MD-VA                   | 1985-2005 | 25.8(87%) | 0.4(0.2) | 6.0(0.6) | 0.3(0.1) | 11.6(0.5) |
| USA | Youngstown-<br>Warren, OH                  | 1985-2005 | 20.8(85%) | 0.3(0.6) | 6.3(0.6) | 0.4(0.2) | 11.5(0.5) |
| USA | York, PA                                   | 1986-2005 | 22.5(82%) | 0.4(0.6) | 6.3(0.5) | 0.5(0.2) | 10.7(0.4) |
